# Supplementary material
Source: Frontiers journal article supplement (https://www.frontiersin.org/articles/160841)

**Supplementary Figure 1: Inter-assessment Cluster Analysis Dendrogram.** A Euclidian distance matrix was used to create a dendrogram of the NCPT subtests. Initially, each subtest was assigned to its own cluster and then the algorithm proceeded iteratively, at each stage joining the two most similar clusters, continuing until there was just a single cluster. Using this methodology, the most right position of the dendrogram nodes appears to support three groupings.

AR (Arithmetic Reasoning), DS (Digit Symbol Coding), GR (Grammatical Reasoning), FMS (Forward Memory Span), PM (Progressive Matrices), RMS (Reverse Memory Span), TA (Trail (Making A), TB (Trail Making B)

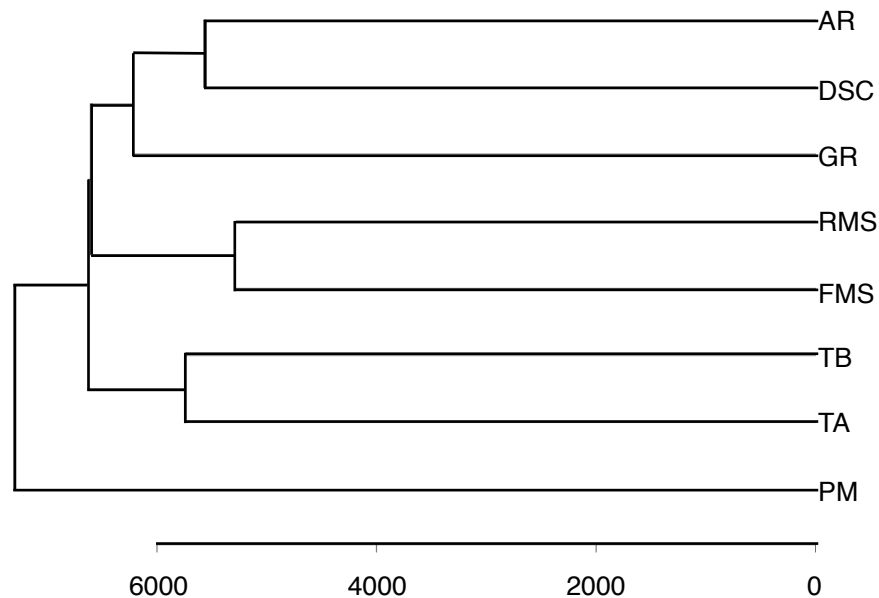

Supplement: Image_1.PDF [file Image_1.PDF]
