# Supplementary material
Source: Frontiers journal article supplement (https://www.frontiersin.org/articles/160841)

**Supplementary Figure 2: Interaction between age and education.** Education was grouped by years that correspond to levels of education: High school or less (0 - 12 years); Bachelor's degree (13 - 16 years); Post-graduate (17+ years). The interaction of age and education revealed that the decline in NCPT Grand Index with age was less steep for those with  $\leq 12$  years of education. A similar pattern of confluence is seen for all other subtests, with the exception of Grammatical Reasoning and Progressive Matrices, which show a pattern of parallelism. The curves were smoothed with a General Additive Model (GAM).

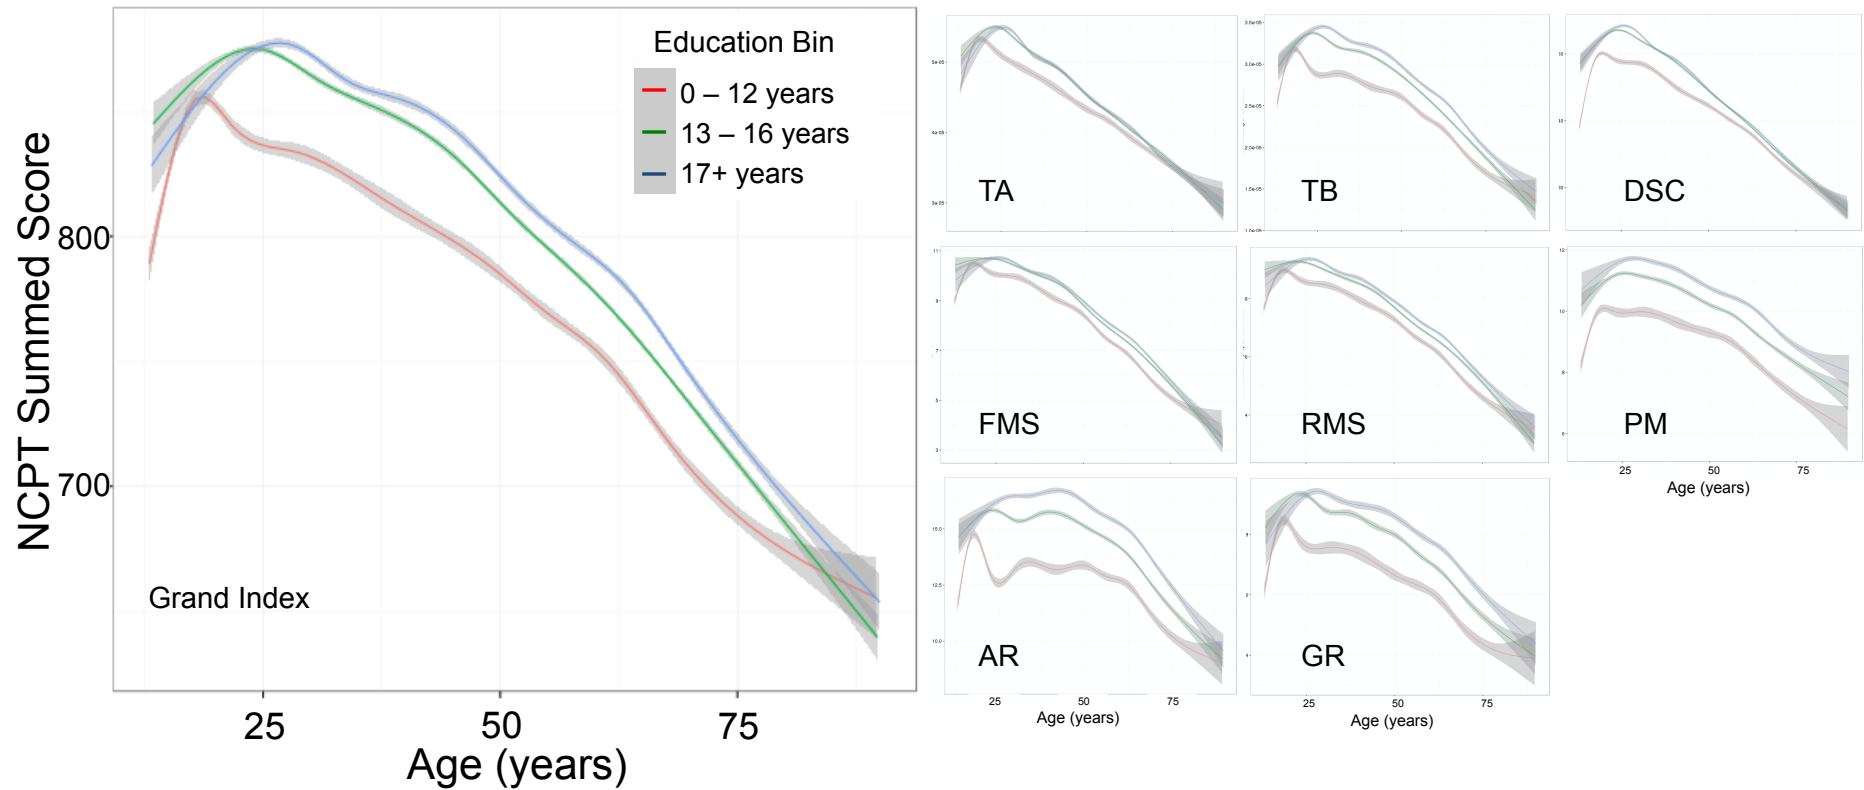

Supplement: Image_2.PDF [file Image_2.PDF]
