# Supplementary material
Source: Frontiers journal article supplement (https://www.frontiersin.org/articles/160841)
Supplement: Table_4.PDF [file Table_4.PDF]

**Supplementary Table 4. Test-retest reliability (r) by inter-trial interval.** Inter-trial interval (ITI) is the number of days between assessments, and test-retest reliability (TRT) is the Pearson correlation coefficient between scores at baseline and follow-up. Most participants took their second assessment approximately 10 weeks later (median ITI = 78.8 days)

| ITI<br>(days) | N      | Median TRT<br>(Pearson's r) | Mean TRT (SD)<br>(Pearson's r) | 95% Confidence<br>Interval |
|---------------|--------|-----------------------------|--------------------------------|----------------------------|
| 29-68         | 63     | 0.87                        | 0.66 (0.550)                   | [0.50, 0.78]               |
| 69-88         | 30,873 | 0.83                        | 0.83 (0.013)                   | [0.83, 0.84]               |
| 89-108        | 2,328  | 0.84                        | 0.83 (0.038)                   | [0.81, 0.84]               |
| 109-225       | 2,515  | 0.85                        | 0.79 (0.279)                   | [0.78, 0.81]               |
